# Supplementary material for: Predicting drug side-effect profiles: a chemical fragment-based approach
Source: Springer Nature journal article supplement (doi:10.1186/1471-2105-12-169), 2011-05-18

### Index-plot

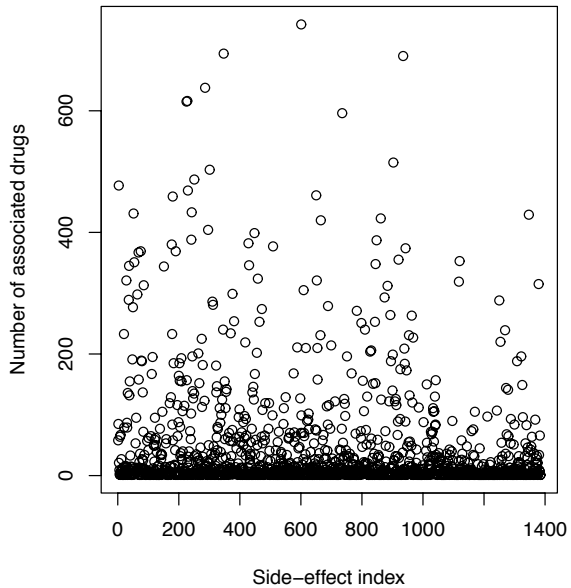

### Histogram

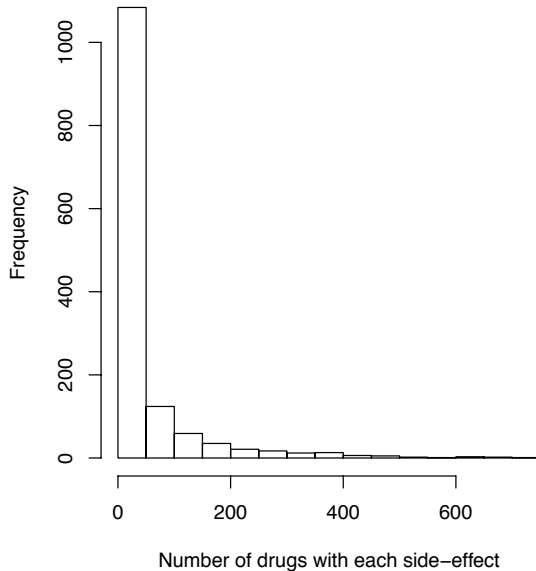

Supplement: 12859_2010_4595_MOESM3_ESM.pdf [file 12859_2010_4595_MOESM3_ESM.pdf]
