# Supplementary material for: Predicting drug side-effect profiles: a chemical fragment-based approach
Source: Springer Nature journal article supplement (doi:10.1186/1471-2105-12-169), 2011-05-18

Accuracy of top 10 predictions

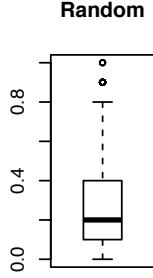

Accuracy of top 10 predictions

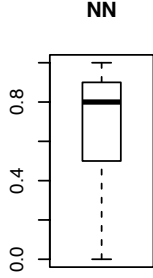

Accuracy of top 10 predictions

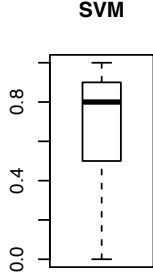

Accuracy of top 10 predictions

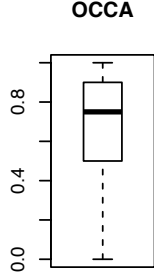

Accuracy of top 10 predictions

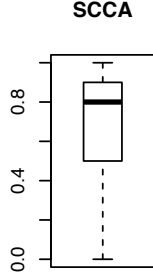

Accuracy of top 100 predictions

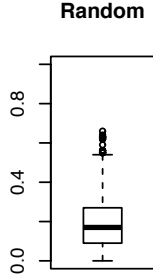

Accuracy of top 100 predictions

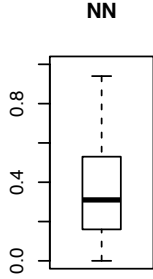

Accuracy of top 100 predictions

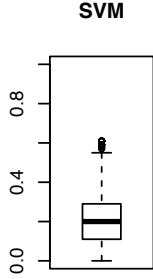

Accuracy of top 100 predictions

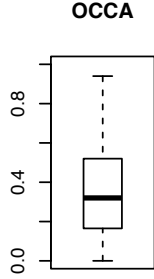

Accuracy of top 100 predictions

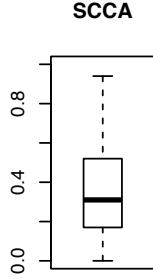

Supplement: 12859_2010_4595_MOESM5_ESM.pdf [file 12859_2010_4595_MOESM5_ESM.pdf]
