# Supplementary material for: Predicting drug side-effect profiles: a chemical fragment-based approach
Source: Springer Nature journal article supplement (doi:10.1186/1471-2105-12-169), 2011-05-18
Supplement: 12859_2010_4595_MOESM11_ESM.pdf [file 12859_2010_4595_MOESM11_ESM.pdf]

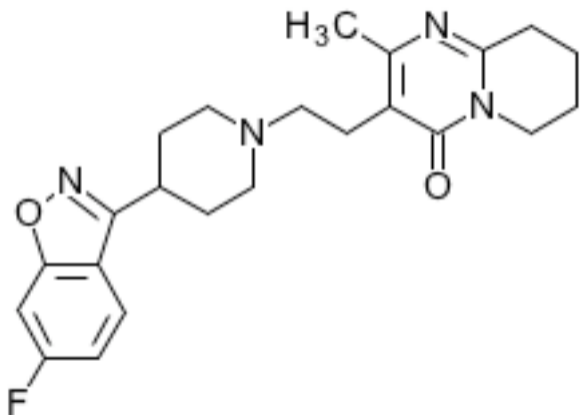

D00426
